# Supplementary material for: A meta-analysis of Prognostic factor of Pancreatic neuroendocrine neoplasms
Source: PubMed Central journal article supplement (PMC5940798; doi:10.1038/s41598-018-24072-0), 2018-05-08
Supplement: 41598_2018_24072_MOESM1_ESM.pdf [file 41598_2018_24072_MOESM1_ESM.pdf]

## A meta-analysis of Prognostic factor of Pancreatic neuroendocrine neoplasms

Yong Gao<sup>1, 2, 3, +</sup>, Hao Gao<sup>1, 2, 3, +</sup>, Guangfu Wang<sup>1, 2, 3, +</sup>, Lingdi Yin<sup>1, 2, 3</sup>, Wenbin Xu<sup>1, 2, 3</sup>, Yunpeng Peng<sup>1, 2, 3</sup>, Junli Wu<sup>1, 2, 3</sup>, Kuirong Jiang<sup>1, 2, 3</sup>, Yi Miao<sup>1, 2, 3, \*</sup>

<sup>1</sup>Pancreas Center, The First Affiliated Hospital of Nanjing Medical University, Nanjing, 210029, People's Republic of China.

<sup>2</sup>Pancreas Institute of Nanjing Medical University, Nanjing, 210029, People's Republic of China.

<sup>3</sup>Department of General Surgery, The First Affiliated Hospital of Nanjing Medical University, Nanjing, 210029, People's Republic of China.

\* corresponding. miaoyi@njmu.edu.cn

<sup>+</sup>these authors contributed equally to this work

| Factor            | Number of articles | OR    | 95%CI      | P       | I <sup>2</sup> (%) |
|-------------------|--------------------|-------|------------|---------|--------------------|
| Gender            | 3                  | 1.38  | 0.44-4.36  | 0.58    | 65                 |
| Age               | 3                  | 1.59  | 0.69-3.69  | 0.28    | 60                 |
| Function          | 6                  | 0.75  | 0.63-0.90  | 0.002   | 47                 |
| Margin            | 3                  | 13.05 | 3.15-54.08 | 0.004   | 80                 |
| G stage           | 4                  | 5.43  | 2.46-11.99 | <0.0001 | 41                 |
| Lymph Node        | 3                  | 5.79  | 4.62-7.26  | <0.0001 | 60                 |
| Vascular Invasion | 2                  | 2.57  | 1.40-4.75  | 0.002   | 0                  |
| Metastasis        | 3                  | 4.81  | 2.07-11.15 | 0.0003  | 54                 |

Supplementary Table 1 shows the combined data based on the articles in large samples.

| Factor | Number of articles | OR   | 95%CI     | P    | I <sup>2</sup> (%) |
|--------|--------------------|------|-----------|------|--------------------|
| Gender | 3                  | 1.38 | 0.44-4.36 | 0.58 | 65                 |
| Age    | 3                  | 1.59 | 0.69-3.69 | 0.28 | 60                 |

|            |   |      |            |         |    |
|------------|---|------|------------|---------|----|
| Function   | 4 | 0.66 | 0.22-1.98  | 0.46    | 64 |
| G stage    | 5 | 8.19 | 3.14-21.36 | <0.0001 | 0  |
| TMN stage  | 3 | 8.56 | 2.00-36.71 | 0.004   | 14 |
| Lymph      |   |      |            |         |    |
| Node       | 3 | 5.79 | 4.62-7.26  | <0.0001 | 0  |
| Metastasis | 3 | 7.91 | 3.73-16.81 | <0.0001 | 0  |
| Size       | 4 | 0.22 | 0.03-1.42  | 0.11    | 0  |

Supplementary Table 2 shows the Pooled data based on the articles in Asian area.

| Factor   | Number of articles | OR   | 95%CI     | P     | I <sup>2</sup> (%) |
|----------|--------------------|------|-----------|-------|--------------------|
| Function | 3                  | 0.77 | 0.63-0.93 | 0.007 | 0                  |
| Lymph    |                    |      |           |       |                    |
| Node     | 3                  | 1.51 | 0.86-2.68 | 0.15  | 26                 |

Supplementary Table 3 show the Combined data based on the patients from western country.
